# Supplementary material for: Improved forecasts of influenza-associated hospitalization rates with Google Search Trends
Source: J R Soc Interface. 2019 Jun 12;16(155):20190080. doi: 10.1098/rsif.2019.0080 (PMC6597779; doi:10.1098/rsif.2019.0080)
Supplement: R script to analyze data and generate tables/plots used in the manuscript [file rsif20190080supp2.R]

library(data.table)
library(magrittr)
library(ggplot2)
library(doBy)
library(grid)

vplayout <- function(x, y) viewport(layout.pos.row = x, layout.pos.col = y)

# helper function to plot probabilistic forecasts for each target
plotTarget <- function(temp, truth, tgt){
  if(tgt == 'Season peak week'){
    reqLevels <- 40:73
  } else{
    reqLevels <- seq(0, 13, by=.1)
  }
  
  p <- ggplot(temp[Target == tgt]) +
    geom_raster(aes(x = F_Week, y = factor(Bin, levels = reqLevels), fill = log(P))) + 
    scale_y_discrete(drop=F) +
    scale_fill_continuous(low = 'yellow', high = 'red') + 
    labs(y = 'Bin') +
    labs(title = tgt, y = 'Outcome bin', x = 'Week') +
    theme_bw() + 
    theme(panel.grid = element_blank(), axis.text.y = element_blank(), axis.ticks.y = element_blank()) +
    guides(fill = F)
  
  if(tgt == 'Season peak rate'){
    p <- p + geom_hline(data = truth[Age_Grp == 'Overall' & Target == tgt & Season %in% unique(temp$Season)],
                        aes(yintercept = as.integer(factor(Value, levels = reqLevels))))
  } else if(grepl('wk ahead', tgt)){
    p <- p + geom_point(data = truth[Age_Grp == 'Overall' & Target == tgt & Season %in% unique(temp$Season) & Week %in% 45:69],
                        aes(x = Week, y = as.integer(factor(Value, levels = reqLevels))))
  } else{
    p <- p +  geom_hline(data = truth[Age_Grp == 'Overall' & Target == tgt & Season %in% unique(temp$Season)],
                         aes(yintercept = as.integer(factor(Value, levels = reqLevels))))
  }
  
  if(grepl('Season', tgt)){
    p <- p + geom_vline(data = truth[Age_Grp == 'Overall' & Target == 'Season peak week' & Season %in% unique(temp$Season), 
                                     j = list(Age_Grp, Season, Value)],
                        aes(xintercept = Value), linetype = 'dashed')
  }
  
  return(p)
}


#### Initializations  ----
# Change this to location on the local machine that has unzipped supporting information
inDir = ''

# Helper maps 
targetMap <- data.table(Type = c('pw', 'pi', paste0('x', 1:4)),
                        Target = c('Season peak week', 'Season peak rate', paste0(1:4, ' wk ahead')))

agecatMap <- data.table(Agecat = c('Overall', '0-4', '5-17', '18-49', '50-64', '65+'),
                        Age_Grp = c('Overall', '0-4 yr', '5-17 yr', '18-49 yr', '50-64 yr', '65 + yr'))


# load ground truth used to calculate sscores and errors reported in the manuscript;
# also used in the plots
truth <- read.csv(file = paste0(inDir, 'Truth.csv'), header = T, check.names = F, stringsAsFactors = F) %>%
  data.table()
truth$Age_Grp <- factor(truth$Age_Grp, levels = c("0-4 yr", "5-17 yr", "18-49 yr", "50-64 yr", "65 + yr", "Overall"))


#### Load dumps of forecasts ----
# load point forecasts
load(paste0(inDir, 'Forecasts_Point.RData'))

cutDate <- dOP[Result == 'train', j = list(Time_Date = max(Time_Date)), by = list(Season, Week)]


# load distributions of forecasts
load(paste0(inDir, 'Forecasts_Dist.RData'))


##### Code for example point/prob forecasts ----  

### Example code to plot mean ensemble trajectory for a single age-group and season
reqSeason <-  '13-14'
reqDates <- seq.Date(as.Date('2013-09-01'), as.Date('2014-05-01'), by = 'month')
fig1 <- ggplot(dOP[Lag == 'L_F' & Season == reqSeason & Agecat == 'Overall' & Time_Date <= max(reqDates) & Week %in% 48:63]) +
  geom_ribbon(aes(x = Time_Date, ymin = pmax(Estimate - 1.5*Estimate_sd, 0), 
                  ymax = Estimate + 1.5*Estimate_sd, fill = Result), alpha = 0.15) +
  geom_line(aes(x = Time_Date, y = Estimate, color = Result), size = 1.01) + 
  geom_vline(data = cutDate[Season == reqSeason & Week %in% 48:63], 
             aes(xintercept = as.integer(Time_Date)), linetype = 'dashed') +
  facet_wrap(~Week, ncol = 4) + 
  scale_x_date(breaks = reqDates, labels = format(reqDates, '%b')) +
  labs( x = 'Date', y = 'Rate (per 100000)') +
  theme_bw() + guides(color = F, fill = F) + 
  theme(panel.grid.minor = element_blank(), strip.text = element_text(size=12))


### Example code to plot forecast distributions for the same age-group and season as above
temp <- dDist[Agecat == 'Overall' & Lag == 'L_F' & Season == reqSeason]
temp$Bin <- ifelse(temp$Type == 'pw', temp$Bin, temp$Bin/1e3)
temp <- merge(temp, targetMap, by = 'Type')

grid.newpage()

pushViewport(viewport(layout = grid.layout(2, 4)))
print(plotTarget(temp, truth, 'Season peak rate'), vp = vplayout(1, 3:4))
print(plotTarget(temp, truth,'1 wk ahead'), vp = vplayout(2, 1))
print(plotTarget(temp, truth,'2 wk ahead'), vp = vplayout(2, 2))
print(plotTarget(temp, truth,'3 wk ahead'), vp = vplayout(2, 3))
print(plotTarget(temp, truth,'4 wk ahead'), vp = vplayout(2, 4))
print(plotTarget(temp, truth,'Season peak week'), vp = vplayout(1, 1:2))


#### Manuscript table and plots ----

### Load scores/errors calculate from the forecasts
load(file = paste0(inDir, 'Scores.RData'))
load(file = paste0(inDir, 'Errors.RData'))

maxWeek = 65
reqSeasons <- c('14-15', '15-16', '16-17')


#### Table 1 ----

### Errors for Table 1 

# errors in all intensity targets, by season
dcast(error[Week <= maxWeek & Target != 'Season peak week', 
            j = list(Error = round(mean(Error, trim = 0.005, na.rm = T), 2)), 
            by = list(Season, Lag)], 
      Season~Lag, value.var = 'Error')

# errors in all intensity targets, by target
dcast(error[Season %in% reqSeasons & Week <= maxWeek & Target != 'Season peak week', 
            j = list(Error = round(mean(Error, trim = 0.005, na.rm = T), 2)), 
            by = list(Target, Lag)], 
      Target~Lag, value.var = 'Error')
# errors in season peak week
dcast(error[Season %in% reqSeasons & Week <= maxWeek & Target == 'Season peak week', 
            j = list(Error = round(mean(Error, trim = 0.005, na.rm = T), 2)), 
            by = list(Target, Lag)], 
      Target~Lag, value.var = 'Error')

# errors in all intensity targets, by age group
dcast(error[Season %in% reqSeasons & Week <= maxWeek & Target != 'Season peak week', 
            j = list(Error = round(mean(Error, trim = 0.005, na.rm = T), 2)), 
            by = list(Age_Grp, Lag)], 
      Age_Grp~Lag, value.var = 'Error')


### Log scores for Table 1 
# by season, target and age group. Use scores calculated using intensity margins relative to observed truth.
dcast(score.rel[Week <= maxWeek, 
                j = list(Score = round(mean(Score), 2)), by = list(Season, Lag)], 
      Season~Lag, value.var = 'Score')
dcast(score.rel[Season %in% reqSeasons & Week <= maxWeek, 
                j = list(Score = round(mean(Score), 2)), by = list(Target, Lag)], 
      Target~Lag, value.var = 'Score')
dcast(score.rel[Season %in% reqSeasons & Week <= maxWeek, 
                j = list(Score = round(mean(Score), 2)), by = list(Age_Grp, Lag)], 
      Age_Grp~Lag, value.var = 'Score')


#### Figure 4 ----

# plot Figure 4 in the manuscript
scorePlot <-  score.rel
scorePlot$Age_Grp <- factor(scorePlot$Age_Grp, levels = c("0-4 yr", "5-17 yr", "18-49 yr", "50-64 yr", "65 + yr", "Overall"))

scorePlot.cml <- subset(scorePlot[Lag == 'L_F' & Week <= maxWeek], select = -c(Lag))
scorePlot.cml <- scorePlot.cml[, j = list(Week, Score = cumsum(Score)), by = list(Season, Target, Age_Grp)]

fig4 <- ggplot(scorePlot.cml) +
  geom_line(aes(x = Week, y = Score, color = Target), alpha = 0.9) +
  scale_color_manual(values = c('black', 'grey', 'orange', 'red', 'darkgreen', 'blue')) + 
  geom_vline(data = truth[Target == 'Season peak week' & Season %in% unique(scorePlot.cml$Season)], 
             aes(xintercept = Value), linetype = 'dashed') +
  facet_grid(Season~Age_Grp) + 
  labs(x = 'Week', y = 'Log score, cumulative') +
  theme_bw() + 
  theme(legend.position = 'bottom', panel.grid = element_blank(), 
        title = element_text(size = 16), strip.text = element_text(size = 16), legend.text = element_text(size = 16)) +
  guides(color = guide_legend(keywidth = 2, keyheight = 1, override.aes = list(size = 1.1, alpha = 1), nrow=1), shape = F)


#### Figure 5 ----

# plot Figure 5 in the manuscript
scorePlot.allTgts <- scorePlot[, 
                               j = list(Score = round(mean(Score), 3)), 
                               by = list(Season, Age_Grp, Lag, Week)] # sum across all targets


fig5 <- ggplot(scorePlot.allTgts[ Lag != 'L_F' & Week <=maxWeek & Season %in% reqSeasons]) +
  geom_line(aes(x = Week, y = Score, color = Lag), alpha = 0.9) +
  scale_color_manual(values = c('orange', 'red', 'darkgreen', 'blue', 'magenta')) +
  geom_line(data = scorePlot.allTgts[ Lag == 'L_F' & Week <=maxWeek & Season %in% reqSeasons], 
            aes(x = Week, y = Score), color = 'black', size = .9) +
  geom_vline(data = truth[Target == 'Season peak week' & Season %in% reqSeasons], 
             aes(xintercept = Value), color = 'darkgrey') +
  facet_grid(Season~Age_Grp) + 
  labs(y = 'Log score') +
  theme_bw() + 
  theme(legend.position = 'bottom', panel.grid = element_blank(), 
        title = element_text(size = 16), strip.text = element_text(size = 16), legend.text = element_text(size = 16)) +
  guides(color = guide_legend(keywidth = 2, keyheight = 1, override.aes = list(size = 1.1, alpha = 1), nrow=1), shape = F)


##### Figure 3 ----
# plot Figure 3 in the manuscript

truth$Bin = ifelse(truth$Target == 'Season peak week' & truth$Season == '14-15' & truth$Value > 53,
                   truth$Value - 53, truth$Value)
truth$Bin = ifelse(truth$Target == 'Season peak week' & truth$Season != '14-15' & truth$Value > 52,
                   truth$Value - 52, truth$Value)

errPlot <- merge(error, subset(truth, Target == 'Season peak week', select = -c(Target, Week)), 
                 by = c('Season', 'Age_Grp'), 
                 allow.cartesian = T)
errPlot <- errPlot[, j = list(Error, Value = max(Value)), 
                   by = list(Season, Age_Grp, Target, Lag, Week)]
errPlot$Week.rel <- errPlot$Week - errPlot$Value

errPlotMean <- errPlot[, j = list(Error = mean(Error, na.rm = T)), 
                       by = list(Target, Lag, Week.rel)]
p1 <- ggplot(errPlot[Lag == 'L_F' & Week.rel %in% -8:8 & grepl('wk ahead', Target)]) +
  geom_boxplot(aes(x = factor(Week.rel), y = Error, color = Age_Grp), width = 0.75, alpha=0.25) +
  geom_point(data = errPlotMean[Lag == 'L_F' & Week.rel %in% -8:8 & grepl('wk ahead', Target)], 
             aes(x = factor(Week.rel), y = Error), shape =17) +
  geom_line(data = errPlotMean[Lag == 'L_F' & Week.rel %in% -8:8 & grepl('wk ahead', Target)], 
            aes(x = as.integer(factor(Week.rel)), y = Error)) +
  facet_grid(~Target)  +
  theme_bw() + guides(color = F) + 
  theme(axis.title.x = element_blank(), strip.text = element_text(size=12))

p2 <- ggplot(errPlot[Lag == 'L_F' & Week.rel %in% -8:4 & !grepl('wk ahead', Target)]) +
  geom_boxplot(aes(x = factor(Week.rel), y = Error, color = Age_Grp), width = 0.75, alpha=0.25) +
  geom_point(data = errPlotMean[Lag == 'L_F' & Week.rel %in% -8:4 & !grepl('wk ahead', Target)], 
             aes(x = factor(Week.rel), y = Error), shape =17) +
  geom_line(data = errPlotMean[Lag == 'L_F' & Week.rel %in% -8:4 & !grepl('wk ahead', Target)], 
            aes(x = as.integer(factor(Week.rel)), y = Error)) +
  facet_wrap(~Target, ncol = 2, scales = 'free_y') + 
  labs(x = 'Week relative observed true peak', color = 'Age Group') +
  theme_bw() + theme(legend.position = 'bottom', strip.text = element_text(size=12)) +
  guides(color = guide_legend(nrow = 1))

p3 <- ggplot(errPlotMean[Lag == 'L_F' & Week.rel %in% -8:8 & grepl('wk ahead', Target)]) +
  geom_point(aes(x = factor(Week.rel), y = Error, color = Target), shape =17) +
  geom_line(aes(x = as.integer(factor(Week.rel)), y = Error, color = Target)) +
  labs(x = 'Week relative observed true peak', color = 'Target', title = 'Near term forecasts') +
  theme_bw() + theme(legend.position = 'bottom')


pushViewport(viewport(layout = grid.layout(2, 1)))
print(p2, vp = vplayout(1, 1))
print(p3, vp = vplayout(2, 1))
